# Supplementary material
Source: publisher site journal article supplement (https://www.dovepress.com/get_supplementary_file.php?f=297523.docx)
Supplement: Supplementary file 1 [file get_supplementary_file.php]

**Supplementary Table 1.** Correlation of chemotherapy drug with VL incidence

| Items | VL patients (n=49) | Non-VL patients (n=237) | *P* value |
| --- | --- | --- | --- |
| Chemotherapy drug No. (%) |  |  | 0.819 |
| Adriamycin | 26 (53.1%) | 130 (54.9%) |  |
| Arsenic trioxide | 23 (46.9%) | 107 (45.1%) |  |

Comparison was determined by Chi-square test. VL, vascular lake.
